# Supplementary material
Source: PubMed Central journal article supplement (PMC7250393)
Supplement: NIHMS1584397-supplement-supplemental.pdf [file NIHMS1584397-supplement-supplemental.pdf]

The Structure of Self-Regulation and Its Psychological and Physical Health Correlates in Older Adults

**Supplemental Material**

|                                                                                                                                                 |    |
|-------------------------------------------------------------------------------------------------------------------------------------------------|----|
| <b>Table S1:</b> Fit indices for confirmatory factor analysis at waves 1, 3, and 5.....                                                         | 2  |
| <b>Table S2:</b> Fit indices for longitudinal confirmatory factor analysis for factors.....                                                     | 3  |
| <b>Table S3:</b> Results of multilevel models predicting repetitive thought purpose.....                                                        | 4  |
| <b>Table S4:</b> Results of multilevel models predicting dyadic cohesion.....                                                                   | 5  |
| <b>Table S5:</b> Results of multilevel models predicting waist circumference.....                                                               | 6  |
| <b>Table S6:</b> Results of multilevel models predicting mean arterial pressure.....                                                            | 7  |
| <b>Table S7:</b> Exploratory models: Effects of conscientiousness on executive function and subjective self-regulation components.....          | 8  |
| <b>Table S8:</b> Exploratory models: Effects of executive function components on psychological and physical health between people.....          | 9  |
| <b>Table S9:</b> Exploratory models: effects of subjective self-regulation components on psychological and physical health between people.....  | 10 |
| <b>Table S10:</b> Exploratory models: effects of subjective self-regulation components on psychological and physical health within people ..... | 11 |

**Table S1:** Fit indices for confirmatory factor analysis at waves 1, 3, and 5.

|        | $\chi^2$ | <i>df</i>   | <i>p</i> | SRMSR | RMSEA | CFI  | TLI  |
|--------|----------|-------------|----------|-------|-------|------|------|
| Wave 1 | 151.11   | 115 (N=149) | .013     | .068  | .046  | .967 | .961 |
| Wave 3 | 157.43   | 115 (N=133) | .005     | .066  | .053  | .961 | .954 |
| Wave 5 | 197.85   | 116 (N=118) | <.001    | .082  | .077  | .912 | .897 |

*Note.* SRMSR = standardized root mean squared residual; RMSEA = root mean square error of approximation; TLI = Tucker-Lewis index; CFI = comparative fit index.

**Table S2:** Fit indices for longitudinal confirmatory factor analysis for each factor.

|                                   | $\chi^2$ | df  | <i>p</i> | SRMR | RMSEA | RMSEA<br>90 % CI | CFI  | TLI  | Constraint<br>Tenable |
|-----------------------------------|----------|-----|----------|------|-------|------------------|------|------|-----------------------|
| <b>Subjective Self-Regulation</b> |          |     |          |      |       |                  |      |      |                       |
| Null model                        | 3807.11  | 351 | < .001   | --   | --    | --               | --   | --   | --                    |
| Configural Invariance             | 363.29   | 294 | .004     | .055 | .040  | .024-.053        | .980 | .976 | --                    |
| Weak Invariance                   | 378.61   | 310 | .005     | .063 | .039  | .023-.052        | .980 | .978 | Yes                   |
| Strong Invariance                 | 813.50   | 327 | <.001    | 2.98 | .100  | .092-.109        | .859 | .849 | No                    |
| <b>Executive Function</b>         |          |     |          |      |       |                  |      |      |                       |
| Null model                        | 1109.87  | 105 | < .001   | --   | --    | --               | --   | --   | --                    |
| Configural Invariance             | 102.98   | 72  | .010     | .054 | .054  | .027-.076        | .969 | .955 | --                    |
| Weak Invariance                   | 112.77   | 80  | .009     | .067 | .052  | .027-.074        | .967 | .957 | Yes                   |
| Strong Invariance                 | 128.62   | 88  | .003     | .071 | .056  | .033-.076        | .960 | .952 | No                    |
| <b>HRV</b>                        |          |     |          |      |       |                  |      |      |                       |
| Null model                        | 534.45   | 36  | <.001    | --   | --    | --               | --   | --   | --                    |
| Configural Invariance             | 39.11    | 15  | .001     | .155 | .109  | .068-.151        | .952 | .884 | --                    |
| Weak Invariance                   | 44.60    | 19  | .001     | .162 | .100  | .062-.138        | .949 | .903 | Yes                   |
| Strong Invariance                 | 46.89    | 23  | .002     | .163 | .087  | .051-.123        | .952 | .925 | Yes                   |

*Note.* Values are based on an appropriate null model calculated to represent no change over time. HRV = heart rate variability; SRMSR = standardized root mean squared residual; RMSEA = root mean square error of approximation; CFI = comparative fit index; TLI = Tucker-Lewis index.

**Table S3:** Results of multilevel models predicting repetitive thought purpose (N=147, n=1017).

|                         | Null Model        | Model 1           | Model 2           | Model 3           | Model 4           |
|-------------------------|-------------------|-------------------|-------------------|-------------------|-------------------|
|                         | $\gamma$ (SE)     |
| <b>Fixed effects</b>    |                   |                   |                   |                   |                   |
| Intercept               | -0.003<br>(0.112) | -0.103<br>(0.198) | -0.147<br>(0.121) | -0.075<br>(0.115) | -0.294<br>(0.214) |
| Age at study<br>entry   |                   | 0.013<br>(0.025)  | 0.032<br>(0.021)  | 0.025<br>(0.020)  | 0.021<br>(0.028)  |
| Education               |                   | 0.120*<br>(0.051) | 0.156*<br>(0.047) | 0.118*<br>(0.046) | 0.167*<br>(0.056) |
| <b>Practice effects</b> |                   |                   |                   |                   |                   |
| EF between              |                   | -0.003<br>(0.282) |                   |                   | 0.196<br>(0.314)  |
| EF within               |                   | 0.920<br>(1.31)   |                   |                   | 1.26<br>(1.51)    |
| HRV between             |                   |                   | 0.065<br>(0.105)  |                   | 0.131<br>(0.123)  |
| HRV within              |                   |                   | -0.002<br>(0.043) |                   | -0.046<br>(0.067) |
| Subjective<br>between   |                   |                   |                   | -0.003<br>(0.007) | -0.005<br>(0.009) |
| Subjective<br>within    |                   |                   |                   | 0.008<br>(0.006)  | 0.006<br>(0.015)  |
| <b>Random effects</b>   |                   |                   |                   |                   |                   |
| Intercept SD            | 1.28              | 1.26              | 1.20              | 1.23              | 1.19              |
| Residual SD             | 1.37              | 1.30              | 1.35              | 1.37              | 1.37              |
| <b>Model fit</b>        |                   |                   |                   |                   |                   |
| LL                      | -1900.5           | -899.1            | -1167.7           | -1835.9           | -565.0            |
| AIC                     | 3807.0            | 1814.2            | 2349.4            | 3685.8            | 1153.9            |

*Note.* Higher repetitive thought purpose is more searching and less solving. EF = executive function; HRV = heart rate variability; LL = log likelihood; AIC = Akaike information criterion.

\* $p < .05$ . \*\*  $p < .001$ .

**Table S4:** Results of multilevel models predicting dyadic cohesion (N=85, n=378).

|                       | Null Model         | Model 1            | Model 2            | Model 3            | Model 4            |
|-----------------------|--------------------|--------------------|--------------------|--------------------|--------------------|
|                       | $\gamma$ (SE)      |
| <b>Fixed effects</b>  |                    |                    |                    |                    |                    |
| Intercept             | 12.28**<br>(0.296) | 12.42**<br>(0.588) | 12.13**<br>(0.329) | 12.21**<br>(0.319) | 11.96**<br>(0.596) |
| Age at study<br>entry |                    | -0.048<br>(0.075)  | 0.003<br>(0.057)   | 0.002<br>(0.056)   | -0.013<br>(0.079)  |
| Education             |                    | 0.042<br>(0.157)   | 0.194<br>(0.130)   | 0.075<br>(0.129)   | 0.123<br>(0.162)   |
| Practice effects      |                    | 0.006<br>(0.810)   |                    |                    | 0.922<br>(0.839)   |
| EF between            |                    | -3.34<br>(3.76)    |                    |                    | -2.40<br>(3.96)    |
| EF within             |                    | -2.68<br>(4.23)    |                    |                    | -6.11<br>(4.89)    |
| HRV between           |                    |                    | 0.029<br>(0.278)   |                    | -0.088<br>(0.354)  |
| HRV within            |                    |                    | -0.048<br>(0.149)  |                    | 0.12<br>(0.168)    |
| Subjective<br>between |                    |                    |                    | 0.016<br>(0.019)   | 0.038<br>(0.027)   |
| Subjective<br>within  |                    |                    |                    | 0.006<br>(0.017)   | -0.006<br>(0.037)  |
| <b>Random effects</b> |                    |                    |                    |                    |                    |
| Intercept SD          | 2.42               | 2.58               | 2.33               | 2.39               | 2.37               |
| HRV within SD         | -                  | -                  | 0.59               | -                  | -                  |
| Residual SD           | 2.34               | 1.97               | 2.26               | 2.35               | 1.92               |
| <b>Model fit</b>      |                    |                    |                    |                    |                    |
| LL                    | -928.2             | -375.4             | -716.4             | -908.1             | -282.5             |
| AIC                   | 1862.4             | 766.7              | 1450.8             | 1830.1             | 589.0              |

*Note.* EF = executive function; HRV = heart rate variability; LL = log likelihood; AIC = Akaike information criterion.

\* $p < .05$ . \*\*  $p < .001$ .

**Table S5:** Results of multilevel models predicting waist circumference (N=149, n=901).

|                       | Null Model        | Model 1            | Model 2            | Model 3            | Model 4            |
|-----------------------|-------------------|--------------------|--------------------|--------------------|--------------------|
|                       | $\gamma$ (SE)     | $\gamma$ (SE)      | $\gamma$ (SE)      | $\gamma$ (SE)      | $\gamma$ (SE)      |
| <b>Fixed effects</b>  |                   |                    |                    |                    |                    |
| Intercept             | 96.62**<br>(1.14) | 115.94**<br>(3.98) | 115.83**<br>(3.79) | 116.92**<br>(3.57) | 115.81**<br>(4.61) |
| Gender                |                   | -12.61**<br>(2.18) | -12.07**<br>(2.27) | -12.66**<br>(2.15) | -12.89**<br>(2.52) |
| Age at study entry    |                   | -0.271<br>(0.208)  | -0.144<br>(0.190)  | -0.115<br>(0.181)  | -0.171<br>(0.238)  |
| Education             |                   | -0.556<br>(0.439)  | -0.558<br>(0.441)  | -0.608<br>(0.427)  | -0.425<br>(0.482)  |
| Practice effects      |                   | 1.02<br>(2.37)     |                    |                    | 2.21<br>(2.69)     |
| EF between            |                   | -12.15<br>(11.11)  |                    |                    | -12.15<br>(13.15)  |
| EF within             |                   | -3.04<br>(6.75)    |                    |                    | -3.54<br>(11.04)   |
| HRV between           |                   |                    | 0.534<br>(0.944)   |                    | 0.769<br>(1.03)    |
| HRV within            |                   |                    | -0.193<br>(0.196)  |                    | -0.209<br>(0.335)  |
| Subjective between    |                   |                    |                    | -0.055<br>(0.061)  | -0.059<br>(0.076)  |
| Subjective within     |                   |                    |                    | 0.026<br>(0.034)   | 0.080<br>(0.071)   |
| <b>Random effects</b> |                   |                    |                    |                    |                    |
| Intercept SD          | 13.62             | 11.78              | 12.32              | 12.17              | 12.11              |
| Subjective within SD  | -                 | -                  | -                  | 0.17               | -                  |
| Residual SD           | 6.21              | 5.53               | 5.58               | 5.99               | 5.52               |
| <b>Model fit</b>      |                   |                    |                    |                    |                    |
| LL                    | -3167.6           | -1484.7            | -1883.2            | -3025.1            | -925.5             |
| AIC                   | 6341.2            | 2987.4             | 3782.4             | 6070.2             | 1876.9             |

*Note.* Gender is coded 1= males, 2= females. EF = executive function; HRV = heart rate variability; LL = log likelihood; AIC = Akaike information criterion.

\* $p < .05$ . \*\*  $p < .001$ .

**Table S6:** Results of multilevel models predicting mean arterial pressure (N=149, n=1009).

|                           | Null Model         | Model 1           | Model 2            | Model 3           | Model 4            |
|---------------------------|--------------------|-------------------|--------------------|-------------------|--------------------|
|                           | $\gamma$ (SE)      | $\gamma$ (SE)     | $\gamma$ (SE)      | $\gamma$ (SE)     | $\gamma$ (SE)      |
| <b>Fixed effects</b>      |                    |                   |                    |                   |                    |
| Intercept                 | 97.32**<br>(0.732) | 99.58**<br>(3.81) | 100.43**<br>(3.32) | 98.93**<br>(2.99) | 104.68**<br>(4.17) |
| Blood pressure medication |                    | -2.38<br>(1.87)   | -3.36*<br>(1.63)   | -3.16*<br>(1.43)  | -3.03<br>(2.05)    |
| Gender                    |                    | 0.717<br>(1.88)   | 0.359<br>(1.77)    | 0.869<br>(1.59)   | -1.49<br>(2.05)    |
| Age at study entry        |                    | -0.078<br>(0.178) | -0.008<br>(0.147)  | -0.006<br>(0.133) | -0.263<br>(0.199)  |
| Education                 |                    | -0.573<br>(0.377) | -0.317<br>(0.341)  | -0.413<br>(0.314) | -0.708<br>(0.390)  |
| <b>Practice effects</b>   |                    |                   |                    |                   |                    |
| EF between                |                    | -0.231<br>(2.06)  |                    |                   | -1.34<br>(2.24)    |
| EF within                 |                    | -1.14<br>(9.53)   |                    |                   | -0.071<br>(0.060)  |
| HRV between               |                    | 3.99<br>(11.94)   | 0.178<br>(0.740)   |                   | -0.019<br>(0.112)  |
| HRV within                |                    |                   | 0.296<br>(0.356)   |                   | 1.24<br>(0.844)    |
| Subjective between        |                    |                   |                    | 0.024<br>(0.045)  | 9.165<br>(10.71)   |
| Subjective within         |                    |                   |                    | 0.031<br>(0.047)  | 25.88<br>(17.33)   |
| <b>Random effects</b>     |                    |                   |                    |                   |                    |
| Intercept SD              | 7.94               | 8.43              | 8.17               | 7.85              | 7.51               |
| Residual SD               | 9.54               | 9.56              | 9.31               | 9.63              | 9.01               |
| <b>Model fit</b>          |                    |                   |                    |                   |                    |
| LL                        | -3831.7            | -1545.3           | -1942.3            | -3083.2           | -903.9             |
| AIC                       | 7669.4             | 3110.7            | 3902.5             | 6184.4            | 1835.7             |

*Note.* Blood pressure medication is coded 1 = taking antihypertensive medication, 0 = not taking antihypertensive medication. Gender is coded 1= males, 2 = females. EF = executive function; HRV = heart rate variability; LL = log likelihood; AIC =Akaike information criterion.

\* $p < .05$ . \*\*  $p < .001$ .

**Table S7:** Exploratory models: Effects of conscientiousness on executive function and subjective self-regulation components.

|                                   |                                             | Conscientiousness: |             |        |
|-----------------------------------|---------------------------------------------|--------------------|-------------|--------|
|                                   |                                             | $\gamma$ (SE)      | $t$ (df)    | $p$    |
| <i>Executive Function</i>         |                                             |                    |             |        |
|                                   | Trail Making Test A-B                       | 0.027 (.025)       | 1.10 (145)  | .27    |
|                                   | Controlled Oral Word Association Test Total | 0.013 (.026)       | 0.510 (146) | .61    |
|                                   | Letter Number Sequencing Total              | 0.037 (.021)       | 1.74 (144)  | .083   |
|                                   | Digit Span Backward                         | -0.007 (0.029)     | -0.25 (145) | .81    |
|                                   | Digit Span Sequencing                       | 0.030 (0.021)      | 1.46 (145)  | .15    |
| <i>Subjective Self-Regulation</i> |                                             |                    |             |        |
|                                   | Inhibit                                     | 1.67 (0.321)       | 5.20 (145)  | < .001 |
|                                   | Shift                                       | 1.49 (0.322)       | 4.62 (145)  | < .001 |
|                                   | Emotional Control                           | 1.86 (0.537)       | 3.46 (145)  | < .001 |
|                                   | Self-Monitor                                | 1.11 (0.290)       | 3.84 (145)  | < .001 |
|                                   | Initiate                                    | 3.03 (0.347)       | 8.74 (145)  | < .001 |
|                                   | Working Memory                              | 2.74 (0.395)       | 6.93 (145)  | < .001 |
|                                   | Plan                                        | 4.48 (0.453)       | 9.89 (145)  | < .001 |
|                                   | Task Monitor                                | 2.01 (0.271)       | 7.43 (145)  | < .001 |
|                                   | Organize                                    | 2.59 (0.394)       | 6.57 (145)  | < .001 |

*Note.* Higher executive function test scores indicate better executive function. Higher subjective self-regulation subscale scores indicate better self-regulation.



**Table S8:** Exploratory models: Effects of executive function components on psychological and physical health between people.

|                           | Trail Making<br>Test<br>A-B score | Controlled<br>Oral Word<br>Association<br>Test total | Letter<br>Number<br>Sequencing<br>total | Digit Span<br>Backward        | Digit Span<br>Sequencing      |
|---------------------------|-----------------------------------|------------------------------------------------------|-----------------------------------------|-------------------------------|-------------------------------|
|                           | $\gamma$ (SE)                     | $\gamma$ (SE)                                        | $\gamma$ (SE)                           | $\gamma$ (SE)                 | $\gamma$ (SE)                 |
| Rep. Thought<br>Valence   | -0.74<br>(1.08)                   | <b>-3.03</b><br><b>(0.89)</b>                        | 0.089<br>(1.24)                         | -0.37<br>(0.90)               | -1.22<br>(1.22)               |
| Rep. Thought<br>Purpose   | 0.22<br>(0.95)                    | -0.51<br>(0.81)                                      | 1.47<br>(1.09)                          | 0.20<br>(0.79)                | 0.66<br>(1.07)                |
| Rep. Thought<br>Total     | -4.6<br>(2.4)                     | -1.67<br>(2.16)                                      | -1.09<br>(2.76)                         | <b>-6.18</b><br><b>(1.94)</b> | <b>-8.35</b><br><b>(2.60)</b> |
| Reappraisal               | -0.14<br>(0.48)                   | -0.12<br>(0.42)                                      | 0.21<br>(0.52)                          | -0.50<br>(0.37)               | 0.06<br>(0.51)                |
| Suppression               | <b>-1.61</b><br><b>(0.60)</b>     | <b>-1.91</b><br><b>(0.52)</b>                        | -1.06<br>(0.69)                         | -1.13<br>(0.51)               | -1.62<br>(0.68)               |
| Dyadic<br>Cohesion        | -3.96<br>(2.94)                   | -1.17<br>(2.16)                                      | -4.60<br>(2.78)                         | -2.45<br>(2.07)               | -3.99<br>(2.79)               |
| Physical<br>Activity      | 2.24<br>(1.33)                    | -0.43<br>(1.13)                                      | 1.73<br>(1.56)                          | -0.60<br>(1.14)               | 1.65<br>(1.53)                |
| BMI                       | 0.07<br>(0.12)                    | -0.23<br>(0.10)                                      | 0.07<br>(0.13)                          | 0.04<br>(0.10)                | 0.08<br>(0.13)                |
| Waist Circum.             | -2.90<br>(8.56)                   | -17.86<br>(7.27)                                     | -11.58<br>(9.25)                        | 0.96<br>(6.82)                | -7.93<br>(9.02)               |
| Mean Arterial<br>Pressure | -3.13<br>(6.57)                   | -3.24<br>(5.38)                                      | -2.48<br>(7.86)                         | 0.20<br>(5.68)                | 11.53<br>(7.48)               |
| Self-Rated<br>Health      | 0.95<br>(0.45)                    | 0.62<br>(0.41)                                       | 0.67<br>(0.51)                          | 0.05<br>(0.38)                | 0.88<br>(0.50)                |

*Note.* Higher executive function test scores indicate better executive function. Higher repetitive thought valence is more negative and less positive content. Higher repetitive thought purpose is more searching and less solving. Higher self-rated health values indicate better self-rated health. Given the exploratory nature of these analyses, we applied a Bonferroni correction of  $p=.01$  (.05/5 predictors). Between-person associations in boldface are statistically significant at the Bonferroni-corrected level. Within-person associations are not displayed (none are statistically significant). BMI = body mass index.

**Table S9:** Exploratory models: Effects of subjective self-regulation components on psychological and physical health between people.

|                        | Inhibit                       | Shift                         | Emotional Control             | Self-Monitor                   | Initiate                       | Working Memory                | Plan                          | Task Monitor                  | Organize Materials            |
|------------------------|-------------------------------|-------------------------------|-------------------------------|--------------------------------|--------------------------------|-------------------------------|-------------------------------|-------------------------------|-------------------------------|
|                        | $\gamma$ (SE)                 | $\gamma$ (SE)                 | $\gamma$ (SE)                 | $\gamma$ (SE)                  | $\gamma$ (SE)                  | $\gamma$ (SE)                 | $\gamma$ (SE)                 | $\gamma$ (SE)                 | $\gamma$ (SE)                 |
| Rep. Thought Valence   | <b>-0.29</b><br><b>(0.06)</b> | <b>-0.38</b><br><b>(0.06)</b> | <b>-0.23</b><br><b>(0.04)</b> | <b>-0.36</b><br><b>(0.07)</b>  | <b>-0.33</b><br><b>(0.05)</b>  | <b>-0.27</b><br><b>(0.05)</b> | <b>-0.19</b><br><b>(0.04)</b> | <b>-0.33</b><br><b>(0.07)</b> | -0.13<br>(0.05)               |
| Rep. Thought Purpose   | 0.01<br>(0.06)                | 0.02<br>(0.06)                | -0.06<br>(0.04)               | -0.01<br>(0.07)                | -0.03<br>(0.05)                | 0.005<br>(0.05)               | 0.0001<br>(0.04)              | 0.009<br>(0.07)               | -0.03<br>(0.05)               |
| Rep. Thought Total     | <b>-0.47</b><br><b>(0.16)</b> | <b>-0.87</b><br><b>(0.15)</b> | <b>-0.56</b><br><b>(0.09)</b> | <b>-0.54</b><br><b>(0.18)</b>  | <b>-0.47</b><br><b>(0.13)</b>  | <b>-0.53</b><br><b>(0.12)</b> | <b>-0.34</b><br><b>(0.09)</b> | <b>-0.65</b><br><b>(0.17)</b> | <b>-0.38</b><br><b>(0.12)</b> |
| Reappraisal            | 0.004<br>(0.03)               | 0.005<br>(0.03)               | 0.02<br>(0.02)                | 0.03<br>(0.04)                 | 0.02<br>(0.03)                 | 0.003<br>(0.02)               | 0.002<br>(0.02)               | 0.02<br>(0.03)                | -0.02<br>(0.02)               |
| Suppression            | -0.02<br>(0.04)               | -0.11<br>(0.04)               | 0.01<br>(0.03)                | 0.02<br>(0.05)                 | -0.09<br>(0.03)                | -0.05<br>(0.03)               | -0.04<br>(0.02)               | -0.07<br>(0.04)               | 0.02<br>(0.03)                |
| Dyadic Cohesion        | -0.07<br>(0.17)               | 0.20<br>(0.17)                | 0.19<br>(0.11)                | 0.14<br>(0.19)                 | 0.08<br>(0.14)                 | 0.21<br>(0.14)                | 0.01<br>(0.10)                | 0.02<br>(0.19)                | 0.02<br>(0.13)                |
| Physical Activity      | 0.13<br>(0.08)                | 0.12<br>(0.08)                | 0.04<br>(0.05)                | 0.12<br>(0.09)                 | <b>0.22</b><br><b>(0.07)</b>   | 0.14<br>(0.06)                | 0.13<br>(0.05)                | 0.23<br>(0.09)                | 0.12<br>(0.06)                |
| BMI                    | -0.008<br>(0.008)             | 0.002<br>(0.008)              | -0.007<br>(0.005)             | <b>-0.02</b><br><b>(0.009)</b> | <b>-0.02</b><br><b>(0.006)</b> | 0.003<br>(0.006)              | -0.005<br>(0.005)             | -0.01<br>(0.009)              | -0.02<br>(0.006)              |
| Waist Circum.          | 0.04<br>(0.55)                | 0.45<br>(0.55)                | -0.25<br>(0.34)               | -1.23<br>(0.62)                | -1.11<br>(0.44)                | 0.34<br>(0.42)                | -0.18<br>(0.33)               | -0.26<br>(0.60)               | -0.93<br>(0.42)               |
| Mean Arterial Pressure | 0.48<br>(0.39)                | 0.57<br>(0.41)                | 0.19<br>(0.25)                | 0.36<br>(0.45)                 | -0.02<br>(0.33)                | 0.28<br>(0.30)                | 0.11<br>(0.24)                | 0.37<br>(0.43)                | -0.43<br>(0.31)               |
| Self-Rated Health      | 0.07<br>(0.03)                | <b>0.11</b><br><b>(0.03)</b>  | <b>0.06</b><br><b>(0.02)</b>  | <b>0.11</b><br><b>(0.03)</b>   | <b>0.14</b><br><b>(0.02)</b>   | <b>0.09</b><br><b>(0.02)</b>  | <b>0.08</b><br><b>(0.02)</b>  | <b>0.16</b><br><b>(0.03)</b>  | <b>0.09</b><br><b>(0.02)</b>  |

*Note.* Higher subjective self-regulation components indicate better self-regulation. Higher repetitive thought valence is more negative and less positive content. Higher repetitive thought purpose is more searching and less solving. Higher self-rated health values indicate better self-rated health. Given the exploratory nature of these analyses, we applied a Bonferroni correction of  $p=.006$  ( $.05/9$  predictors). Between-person associations in boldface are statistically significant at the Bonferroni-corrected level. BMI = body mass index.

**Table S10:** Exploratory models: Effects of subjective self-regulation components on psychological and physical health within people.

|                        | Inhibit          | Shift                         | Emotional Control             | Self-Monitor     | Initiate                     | Working Memory                | Plan                            | Task Monitor                  | Organize Materials            |
|------------------------|------------------|-------------------------------|-------------------------------|------------------|------------------------------|-------------------------------|---------------------------------|-------------------------------|-------------------------------|
|                        | $\gamma$ (SE)    | $\gamma$ (SE)                 | $\gamma$ (SE)                 | $\gamma$ (SE)    | $\gamma$ (SE)                | $\gamma$ (SE)                 | $\gamma$ (SE)                   | $\gamma$ (SE)                 | $\gamma$ (SE)                 |
| Rep. Thought Valence   | -0.08<br>(0.04)  | <b>-0.18</b><br><b>(0.04)</b> | <b>-0.09</b><br><b>(0.03)</b> | -0.07<br>(0.04)  | -0.08<br>(0.04)              | <b>-0.14</b><br><b>(0.03)</b> | <b>-0.12</b><br><b>(0.03)</b>   | <b>-0.16</b><br><b>(0.04)</b> | <b>-0.17</b><br><b>(0.04)</b> |
| Rep. Thought Purpose   | 0.02<br>(0.04)   | 0.04<br>(0.04)                | 0.02<br>(0.03)                | 0.03<br>(0.04)   | 0.03<br>(0.03)               | 0.04<br>(0.03)                | 0.04<br>(0.03)                  | 0.07<br>(0.04)                | 0.04<br>(0.03)                |
| Rep. Thought Total     | -0.16<br>(0.06)  | -0.12<br>(0.07)               | -0.04<br>(0.05)               | -0.18<br>(0.07)  | -0.04<br>(0.06)              | -0.11<br>(0.05)               | -0.02<br>(0.04)                 | -0.01<br>(0.07)               | -0.01<br>(0.06)               |
| Reappraisal            | 0.007<br>(0.02)  | 0.03<br>(0.02)                | 0.02<br>(0.01)                | -0.006<br>(0.02) | 0.02<br>(0.02)               | 0.009<br>(0.01)               | 0.03<br>(0.01)                  | 0.02<br>(0.02)                | <b>0.04</b><br><b>(0.01)</b>  |
| Suppression            | 0.01<br>(0.02)   | 0.0002<br>(0.02)              | 0.007<br>(0.01)               | 0.02<br>(0.02)   | -0.004<br>(0.02)             | 0.001<br>(0.02)               | -0.005<br>(0.01)                | 0.008<br>(0.02)               | 0.00003<br>(0.016)            |
| Dyadic Cohesion        | 0.16<br>(0.11)   | -0.16<br>(0.11)               | 0.01<br>(0.07)                | 0.04<br>(0.11)   | -0.01<br>(0.11)              | 0.21<br>(0.09)                | 0.01<br>(0.08)                  | -0.15<br>(0.12)               | -0.04<br>(0.09)               |
| Physical Activity      | 0.01<br>(0.05)   | 0.10<br>(0.05)                | -0.05<br>(0.04)               | 0.12<br>(0.05)   | 0.006<br>(0.05)              | 0.03<br>(0.04)                | 0.07<br>(0.04)                  | 0.09<br>(0.06)                | 0.07<br>(0.05)                |
| BMI                    | 0.002<br>(0.001) | 0.003<br>(0.001)              | 0.002<br>(0.001)              | 0.001<br>(0.001) | 0.002<br>(0.001)             | 0.002<br>(0.001)              | <b>0.003</b><br><b>(0.0007)</b> | 0.002<br>(0.001)              | 0.002<br>(0.0009)             |
| Waist Circum.          | 0.14<br>(0.18)   | 0.22<br>(0.18)                | 0.05<br>(0.13)                | 0.31<br>(0.19)   | 0.24<br>(0.17)               | 0.18<br>(0.16)                | 0.33<br>(0.13)                  | <b>0.58</b><br><b>(0.20)</b>  | -0.05<br>(0.16)               |
| Mean Arterial Pressure | 0.22<br>(0.29)   | 0.49<br>(0.30)                | 0.03<br>(0.21)                | 0.12<br>(0.30)   | 0.30<br>(0.27)               | 0.05<br>(0.25)                | 0.10<br>(0.20)                  | 0.12<br>(0.32)                | -0.1<br>(0.26)                |
| Self-Rated Health      | 0.005<br>(0.014) | 0.028<br>(0.014)              | 0.011<br>(0.010)              | 0.008<br>(0.014) | <b>0.04</b><br><b>(0.01)</b> | 0.01<br>(0.01)                | 0.007<br>(0.010)                | -0.004<br>(0.015)             | 0.02<br>(0.012)               |

*Note.* Higher subjective self-regulation components indicate better self-regulation. Higher repetitive thought valence is more negative and less positive content. Higher repetitive thought purpose is more searching and less solving. Higher self-rated health values indicate better self-rated health. Given the exploratory nature of these analyses, we applied a Bonferroni correction of  $p=.006$  ( $.05/9$  predictors). Within-person associations in boldface are statistically significant at the Bonferroni-corrected level. BMI = body mass index.
